# Supplementary material for: Chatbot Service Quality: An Experiment Comparing Two Countries with Different Levels of Digital Literacy
Source: MDPI journal article supplement (doi:10.3390/tourhosp5020018), 2024-03-31
Supplement: s1 [file s1]

Supplementary file S1: Items for each dimension

| Dimension               | Cronbach's $\alpha$ | Items                                                                                                                                                                                                                                                                                                                        |
|-------------------------|---------------------|------------------------------------------------------------------------------------------------------------------------------------------------------------------------------------------------------------------------------------------------------------------------------------------------------------------------------|
| e-Service Quality (ESQ) | 0.76                | ESQ1: If Hotel GU's online customer service promises something, it delivers.<br>ESQ2: If a customer wants to make a complaint, Hotel GU's online customer service responds quickly.<br>ESQ3: Hotel GU's online customer service offers a first-time solution.<br>ESQ4: Hotel GU offers personalized online customer service. |
| Security (SC)           | 0.88                | SC1: I believe the [...] service protects my personal data.<br>SC2: In my opinion, the data will be processed confidentially.<br>SC3: I believe the [...] service has security systems in place.<br>SC4: I believe that my personal information is used appropriately by the [...] service.                                  |
| Empathy (E)             | 0.93                | E1: The treatment I received from the [...] service has been good.<br>E2: Contact with the [...] service has been satisfactory.<br>E3: The [...] service dealt with my complaints in a friendly manner.<br>E4: In general, the service was attentive.                                                                        |
| Reliability (R)         | 0.92                | R1: The [...] service is accurate in its response.<br>R2: The [...] service fulfilled my request.<br>R3: The [...] service meets my expectations.<br>R4: The [...] service is always accessible.                                                                                                                             |
| Competence (C)          | 0.77                | C1: The [...] service allows me to modify my booking at any time.<br>C2: The [...] service addresses any problems that arise during the process.<br>C3: The [...] service has the necessary resources to answer my questions.<br>C4: The [...] service fulfills my requests.                                                 |
| Responsiveness (RS)     | 0.73                | RS1: The [...] service responds quickly.<br>RS2: I received immediate answers to my questions.<br>RS3: The [...] service solves my problems quickly.<br>RS4: The [...] service provides me with the required information in a very short time.                                                                               |

|                              |      |                                                                                                                                                                                                                                                                                       |
|------------------------------|------|---------------------------------------------------------------------------------------------------------------------------------------------------------------------------------------------------------------------------------------------------------------------------------------|
|                              |      |                                                                                                                                                                                                                                                                                       |
| Information<br>Quality (InQ) | 0.84 | InQ1: The [...] service offers up-to-date information.<br>InQ2: The information provided by the [...] service is relevant.<br>InQ3: The information offered by the [...] service is adequate.<br>InQ4: I was able to easily understand the information provided by the [...] service. |
